# Supplementary material
Source: publisher site journal article supplement (https://www.dovepress.com/article/446222)
Supplement: Supplementary file 1 [file get_supplementary_file.php]

**Supplemental data 1**

**The safety and efficacy of remimazolam compared to dexmedetomidine for awake tracheal intubation by flexible bronchoscopy: A randomized, double-blind, controlled trial**

Qiumiao Chen1,Bin Qin2,Manqing Zhang2, Yumei Zhou2,Xiaotong Shi2, Yubo Xie1,3

1Department of Anesthesiology, The First Affiliated Hospital of Guangxi Medical University, Nanning, People’s Republic of China; 2Department of Anesthesiology, College of Stomatology, Hospital of Stomatology, Guangxi Medical University, Nanning, People’s Republic of China; 3Guangxi Key Laboratory of Enhanced Recovery after Surgery for Gastrointestinal Cancer, The First Affiliated Hospital of Guangxi Medical University, Nanning, People’s Republic of China

Correspondence: Yubo Xie; Xiaotong Shi, Email [[xybdoctor@163.com](mailto:xybdoctor@163.com.)](mailto:1157817791@qq.com,); Hbb38@163.com

**The ED50 and ED95 doses of remimazolam for sedation undergoing ATI-FB**

**Methods**

Dixon's modified up-and-down method was used to determine the ED50 and ED95 doses of remimazolam for sedation in patients undergoing awake tracheal intubation by flexible bronchoscopy (ATI-FB). The initial dose of remimazolam (Yichang Renfu Pharmaceutical Co. Ltd., approval No. H20200006) was set at 0.08 mg/kg and the dose was designed following the geometric progression with a ratio of 1.2. The dosage for the following case would be established based on the experimental medicine's response in the preceding case. If the previous participant was successfully sedated, the dosage of remimazolam for the subsequent participant would be lowered by one increment. In contrast, if the previous participant was unsuccessfully sedated, the dosage of remimazolam for the subsequent participant would be increased by one increment. The experiment ended when at least six positive and negative outcomes alternated in the waveform. The successful sedation needed the following requirements to be satisfied at the same time: a. collaborate to accomplish tracheal intubation; b. no rescue sedative; c. no rescue local anesthetic. The number of cases in the test was counted from the previous participant whose response changed. So, 34 participants were enrolled, but 33 participants were included in the statistical analysis in this study. Dixon’s modified up-and-down method results for participants were presented in Figure S1.

| **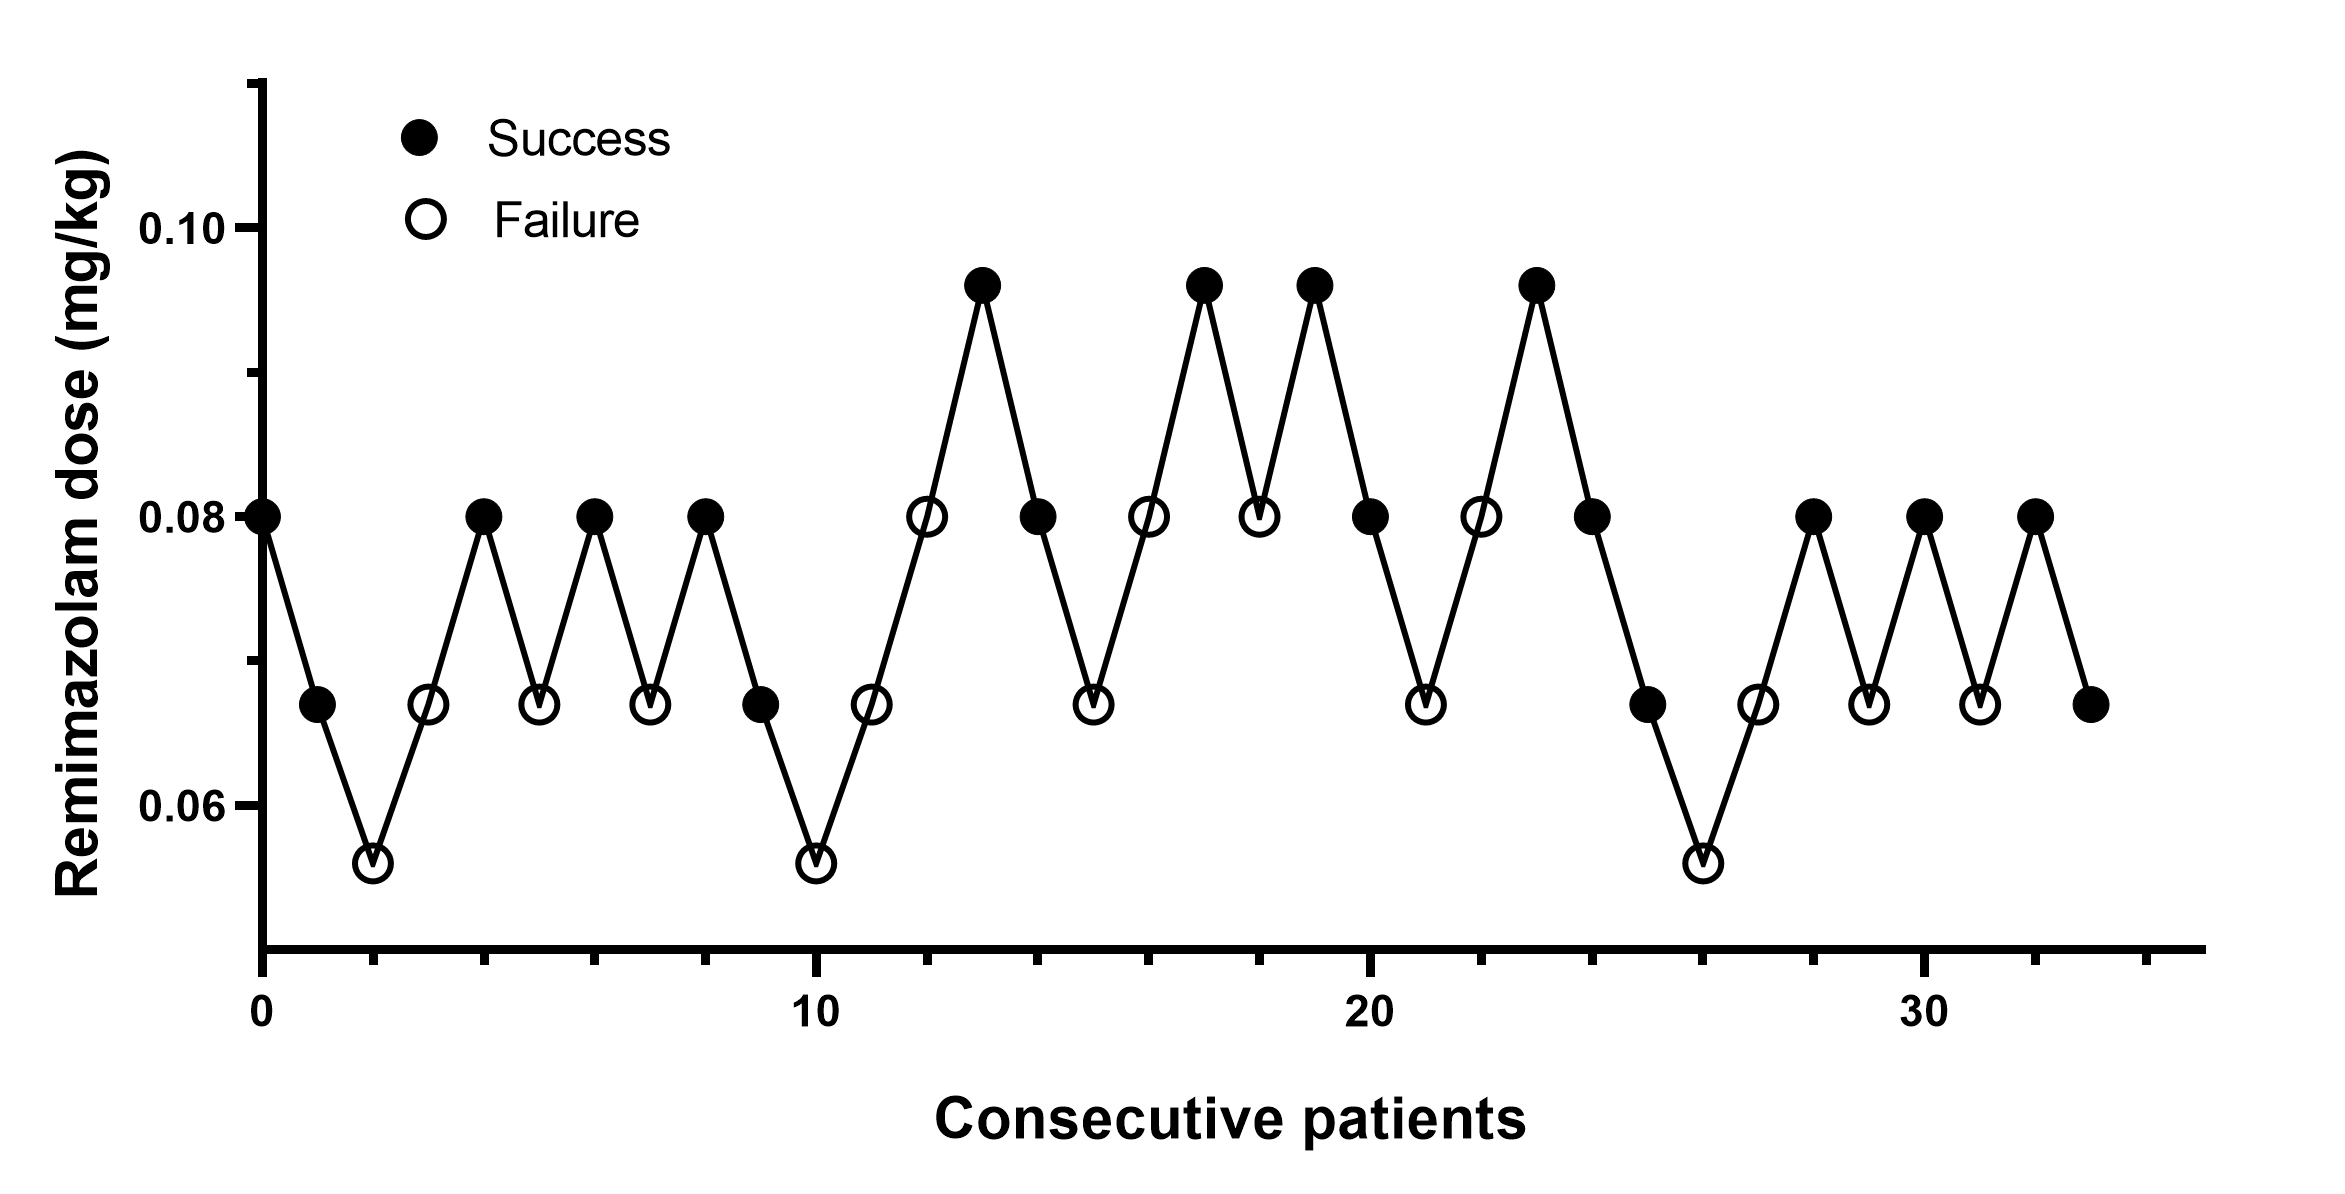** |
| --- |
| Figure S1 The Dixon up-and-down plots demonstrating remimazolam dose reported as successful sedation (solid circle) and failed sedation (hollow circle) in patients for awake tracheal intubation by flexible bronchoscopy. The ED50 and ED95 doses of remimazolam for sedation undergoing ATI-FB were 0.073 (95%CI：0.066～0.080) mg/kg and 0.093 (95%CI：0.083～0.149) mg/kg by the probit regression model. |
